# Supplementary material for: Benchmark forward gravity schemes: the gravity field of a realistic lithosphere model WINTERC-G
Source: Copernicus journal article supplement (doi:10.5194/se-13-849-2022), 2022-05-04
Supplement: Supplementary file [file se-13-849-2022-supplement-title-page.pdf › se-13-849-2022-supplement-title-page.pdf]

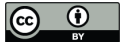

## *Supplement of*

# **Benchmark forward gravity schemes: the gravity field of a realistic lithosphere model WINTERC-G**

**Barend Cornelis Root et al.**

*Correspondence to:* Barend Cornelis Root ([b.c.root@tudelft.nl](mailto:b.c.root@tudelft.nl))

- se-13-849-2022-supplement-title-page.pdf
- code Josef
  - trig\_int
    - \* .DS\_Store
    - \* Trig\_grid\_area.png
    - \* data\_trig\_int\_example.mat
    - \* eff2lnofe.m
    - \* eff2lnofe\_vi.m
    - \* eff2lnofe\_vij.m
    - \* glgrid.m
    - \* main\_trig\_int.m
    - \* newton\_trig\_int\_ver1.m
  - trig\_int.zip
- code\_zdenek
  - .DS\_Store
  - Stokes\_coeffs1\_stopoc
    - \* stopoc.for
    - \* stopoc75.out
  - Stokes\_coeffs1\_stopoc.zip
- parser code
  - cube\_parser\_WINTERC-G\_nonequal.py
  - cube\_parser\_WINTERC-G\_nonequal.py.zip

The copyright of individual parts of the supplement might differ from the article licence.
